# Supplementary material for: QMEAN server for protein model quality estimation
Source: PubMed Central journal article supplement — Nucleic Acids Res. 2009 May 8;37(Web Server issue):W510–4. doi: 10.1093/nar/gkp322 (PMC2703985; doi:10.1093/nar/gkp322), 2009-05-08
Supplement: gkp322_1.pdf [file gkp322_1.pdf]

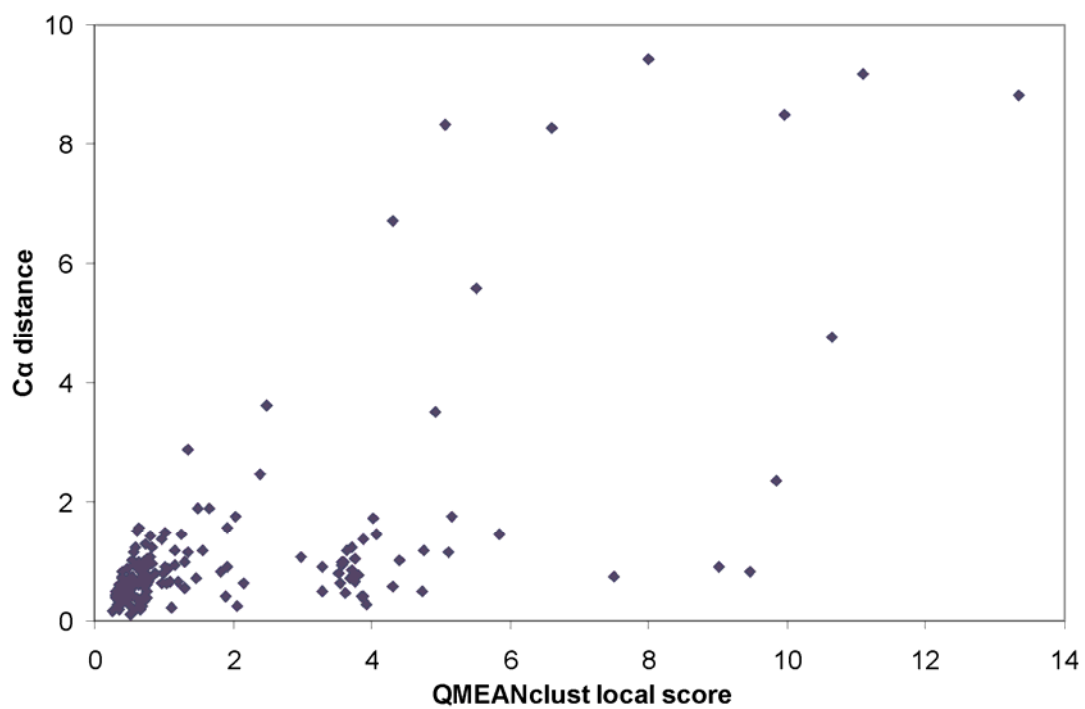

**Figure S1: Scatter plot showing predicted vs. calculated per-residue error for model HHpred3\_TS1 (target T0308). The correlation coefficient is  $r=0.67$ .**
